# Supplementary material
Source: PubMed Central journal article supplement (PMC7390668)
Supplement: NIHMS1569083-supplement-2.pdf [file NIHMS1569083-supplement-2.pdf]

**Supplementary Material** for Blader et al., Stepped treatment for ADHD and aggressive behavior: A randomized, controlled trial of adjunctive risperidone, divalproex sodium, or placebo after stimulant medication optimization. *J Am Acad Child Adolesc Psychiatry*

Patient ID

Visit Type

Date

## Retrospective-Modified Overt Aggression Scale - P

1. Site  2. Child's PCP or psychiatrist  3. Proxima Clinician

4. Child's First Name  5. Child's Last Name

6. Date of Birth  /  /  7. Sex  F  M 8. Age   9. Your Relationship to Child:   
 Mother .....  Other Family Member ..   
 Father .....  Foster Parent .....   
 Grandparent .....  Other Non-Family ...   
 Agency Staff .....

**Instructions:** These questions focus on difficulties with emotions and behavior. Please indicate how many times each of these behaviors occurred in the PAST WEEK.

### Verbal Incidents:

0 - 1 times    2 - 4 times    5 or more times

|                                                                                                                                                                                     |                       |                       |                       |
|-------------------------------------------------------------------------------------------------------------------------------------------------------------------------------------|-----------------------|-----------------------|-----------------------|
| 1. How many times did your child <i>shout angrily, curse, or insult people</i> but then stopped quickly?.....                                                                       | <input type="radio"/> | <input type="radio"/> | <input type="radio"/> |
| 2. How many times did your child <i>shout angrily, curse, or insult people</i> in a repetitive, out-of-control way during episodes that lasted <u>less than five minutes</u> ?..... | <input type="radio"/> | <input type="radio"/> | <input type="radio"/> |
| 3. How many times did your child <i>shout angrily, curse, or insult people</i> in a repetitive, out-of-control way during episodes that lasted <u>more than five minutes</u> ?..... | <input type="radio"/> | <input type="radio"/> | <input type="radio"/> |
| 4. How many times did your child <i>threaten to hurt someone</i> ?.....                                                                                                             | <input type="radio"/> | <input type="radio"/> | <input type="radio"/> |
| 5. Other verbal incidents (Please describe):                                                                                                                                        | <hr/> <hr/>           |                       |                       |

### Incidents Toward Other People:

None    1 - 2 times    3 - 4 times    5 or more times

|                                                                                                                                                                         |                       |                       |                       |                       |
|-------------------------------------------------------------------------------------------------------------------------------------------------------------------------|-----------------------|-----------------------|-----------------------|-----------------------|
| 1. How many times did your child act like he/she was <i>about to hit</i> somebody or <i>took a swing at someone</i> without actually hitting another person?....        | <input type="radio"/> | <input type="radio"/> | <input type="radio"/> | <input type="radio"/> |
| 2. How many times did your child <i>hit someone</i> with hands or an object, <i>kick, push, scratch</i> or <i>pull hair</i> , <u>without causing real injury</u> ?..... | <input type="radio"/> | <input type="radio"/> | <input type="radio"/> | <input type="radio"/> |
| 3. How many times did your child do any of the things in Item 2 <u>and caused some mild injury</u> (bruises, sprains, welts, etc.)?.....                                | <input type="radio"/> | <input type="radio"/> | <input type="radio"/> | <input type="radio"/> |
| 4. How many times did your child do any of the things in Item 2 <u>and caused serious injury</u> (fracture, lost tooth, loss of consciousness, etc.)?....               | <input type="radio"/> | <input type="radio"/> | <input type="radio"/> | <input type="radio"/> |
| 5. Other incidents toward other people (Please describe):                                                                                                               | <hr/> <hr/>           |                       |                       |                       |

**Incidents Involving Property:**

|                                                                                                                                            | <u>None</u>           | <u>1 - 2 times</u>    | <u>3 - 4 times</u>    | <u>5 or more times</u> |
|--------------------------------------------------------------------------------------------------------------------------------------------|-----------------------|-----------------------|-----------------------|------------------------|
| 1. How many times did your child <i>slam a door or cabinet, rip clothing, or knock something over</i> in anger?.....                       | <input type="radio"/> | <input type="radio"/> | <input type="radio"/> | <input type="radio"/>  |
| 2. How many times did your child <i>throw things down, kick furniture, or otherwise misuse things angrily</i> but did not break them?..... | <input type="radio"/> | <input type="radio"/> | <input type="radio"/> | <input type="radio"/>  |
| 3. How many times did your child <i>break things, smash windows, or damage or deface property</i> on purpose?.....                         | <input type="radio"/> | <input type="radio"/> | <input type="radio"/> | <input type="radio"/>  |
| 4. How many times did your child <i>set a fire or throw things at people</i> in order to hurt them?.....                                   | <input type="radio"/> | <input type="radio"/> | <input type="radio"/> | <input type="radio"/>  |
| 5. Other incidents involving property (Please describe):                                                                                   |                       |                       |                       |                        |

**Incidents Directed Toward Self:**

|                                                                                                                                                        | <u>None</u>           | <u>1 - 2 times</u>    | <u>3 - 4 times</u>    | <u>5 or more times</u> |
|--------------------------------------------------------------------------------------------------------------------------------------------------------|-----------------------|-----------------------|-----------------------|------------------------|
| 1. How many times did your child <i>pick at or scratch</i> his or her skin, <i>pull out hair, or hit himself or herself</i> while upset or angry?..... | <input type="radio"/> | <input type="radio"/> | <input type="radio"/> | <input type="radio"/>  |
| 2. How many times did your child <i>bang his or her head, hit his or her fists into the wall, or throw himself or herself</i> on the floor?.....       | <input type="radio"/> | <input type="radio"/> | <input type="radio"/> | <input type="radio"/>  |
| 3. How many times did your child <i>cut, bruise, or burn himself or herself</i> on purpose?.....                                                       | <input type="radio"/> | <input type="radio"/> | <input type="radio"/> | <input type="radio"/>  |
| 4. How many times did your child <i>severely injure himself or herself, or tried to kill himself or herself</i> ?.....                                 | <input type="radio"/> | <input type="radio"/> | <input type="radio"/> | <input type="radio"/>  |
| 5. Other incidents in which your child acted harmfully toward himself or herself (Please describe):                                                    |                       |                       |                       |                        |

**For further info about use contact:**

**Joseph Blader, PhD**  
**University of Texas Health Science Center at San Antonio**  
**blader@uthscsa.edu**

**Staff Use:**

VE.....

PH...

PR.....

SE.....

Total.....

Patient ID

|  |  |  |  |  |  |  |  |  |  |  |  |  |  |  |  |  |  |  |  |
|--|--|--|--|--|--|--|--|--|--|--|--|--|--|--|--|--|--|--|--|
|  |  |  |  |  |  |  |  |  |  |  |  |  |  |  |  |  |  |  |  |
|--|--|--|--|--|--|--|--|--|--|--|--|--|--|--|--|--|--|--|--|

Visit Type

Date

## Retrospective-Modified Overt Aggression Scale - P

|                                                                                                                                                                                                                                                                                                   |                                                    |                      |
|---------------------------------------------------------------------------------------------------------------------------------------------------------------------------------------------------------------------------------------------------------------------------------------------------|----------------------------------------------------|----------------------|
| 1. Site                                                                                                                                                                                                                                                                                           | 2. Child's PCP or psychiatrist                     | 3. Proxima Clinician |
|                                                                                                                                                                                                                                                                                                   |                                                    |                      |
| 4. Child's First Name                                                                                                                                                                                                                                                                             | 5. Child's Last Name                               |                      |
|                                                                                                                                                                                                                                                                                                   |                                                    |                      |
| 6. Date of Birth                                                                                                                                                                                                                                                                                  | 7. Sex                                             | 8. Age               |
|                                                                                                                                                                                                                                                                                                   | <input type="radio"/> F<br><input type="radio"/> M |                      |
| 9. Your Relationship to Child:                                                                                                                                                                                                                                                                    |                                                    |                      |
| Mother ..... <input type="radio"/> Other Family Member .. <input type="radio"/><br>Father ..... <input type="radio"/> Foster Parent ..... <input type="radio"/><br>Grandparent ..... <input type="radio"/> Other Non-Family ... <input type="radio"/><br>Agency Staff ..... <input type="radio"/> |                                                    |                      |

**Instructions:** These questions focus on difficulties with emotions and behavior. Please indicate how many times each of these behaviors occurred in the PAST WEEK.

### Verbal Incidents:

0 - 1 times      2 - 4 times      5 or more times

|                                                                                                                                                                                     |                         |                         |                         |
|-------------------------------------------------------------------------------------------------------------------------------------------------------------------------------------|-------------------------|-------------------------|-------------------------|
| 1. How many times did your child <i>shout angrily, curse, or insult people</i> but then stopped quickly?.....                                                                       | <input type="radio"/> 0 | <input type="radio"/> 1 | <input type="radio"/> 2 |
| 2. How many times did your child <i>shout angrily, curse, or insult people</i> in a repetitive, out-of-control way during episodes that lasted <u>less than five minutes</u> ?..... | <input type="radio"/> 0 | <input type="radio"/> 2 | <input type="radio"/> 4 |
| 3. How many times did your child <i>shout angrily, curse, or insult people</i> in a repetitive, out-of-control way during episodes that lasted <u>more than five minutes</u> ?..... | <input type="radio"/> 0 | <input type="radio"/> 3 | <input type="radio"/> 6 |
| 4. How many times did your child <i>threaten to hurt someone</i> ?.....                                                                                                             | <input type="radio"/> 0 | <input type="radio"/> 4 | <input type="radio"/> 8 |
| 5. Other verbal incidents (Please describe):<br>_____<br>_____                                                                                                                      |                         |                         |                         |

### Incidents Toward Other People:

None      1 - 2 times      3 - 4 times      5 or more times

|                                                                                                                                                                  |                         |                          |                          |                          |
|------------------------------------------------------------------------------------------------------------------------------------------------------------------|-------------------------|--------------------------|--------------------------|--------------------------|
| 1. How many times did your child act like he/she was <i>about to hit</i> somebody or <i>took a swing at someone</i> without actually hitting another person?.... | <input type="radio"/> 0 | <input type="radio"/> 4  | <input type="radio"/> 8  | <input type="radio"/> 12 |
| 2. How many times did your child <i>hit someone</i> with hands or an object, <i>kick, push, scratch</i> or <i>pull hair, without causing real injury</i> ?.....  | <input type="radio"/> 0 | <input type="radio"/> 8  | <input type="radio"/> 16 | <input type="radio"/> 24 |
| 3. How many times did your child do any of the things in Item 2 <u>and caused some mild injury</u> (bruises, sprains, welts, etc.)?.....                         | <input type="radio"/> 0 | <input type="radio"/> 12 | <input type="radio"/> 24 | <input type="radio"/> 36 |
| 4. How many times did your child do any of the things in Item 2 <u>and caused serious injury</u> (fracture, lost tooth, loss of consciousness, etc.)?....        | <input type="radio"/> 0 | <input type="radio"/> 16 | <input type="radio"/> 32 | <input type="radio"/> 48 |
| 5. Other incidents toward other people (Please describe):<br>_____<br>_____                                                                                      |                         |                          |                          |                          |

**Incidents Involving Property:**

|                                                                                                                                            | None                    | 1 - 2 times             | 3 - 4 times              | 5 or more times          |
|--------------------------------------------------------------------------------------------------------------------------------------------|-------------------------|-------------------------|--------------------------|--------------------------|
| 1. How many times did your child <i>slam a door or cabinet, rip clothing, or knock something over</i> in anger?.....                       | <input type="radio"/> 0 | <input type="radio"/> 2 | <input type="radio"/> 4  | <input type="radio"/> 6  |
| 2. How many times did your child <i>throw things down, kick furniture, or otherwise misuse things angrily</i> but did not break them?..... | <input type="radio"/> 0 | <input type="radio"/> 4 | <input type="radio"/> 8  | <input type="radio"/> 12 |
| 3. How many times did your child <i>break things, smash windows, or damage or deface property</i> on purpose?.....                         | <input type="radio"/> 0 | <input type="radio"/> 6 | <input type="radio"/> 12 | <input type="radio"/> 18 |
| 4. How many times did your child <i>set a fire or throw things at people</i> in order to hurt them?.....                                   | <input type="radio"/> 0 | <input type="radio"/> 8 | <input type="radio"/> 16 | <input type="radio"/> 24 |
| 5. Other incidents involving property (Please describe):                                                                                   |                         |                         |                          |                          |

**Incidents Directed Toward Self:**

|                                                                                                                                                                | None                    | 1 - 2 times              | 3 - 4 times              | 5 or more times          |
|----------------------------------------------------------------------------------------------------------------------------------------------------------------|-------------------------|--------------------------|--------------------------|--------------------------|
| 1. How many times did your child <i>pick at or scratch</i> his or her skin, <i>pull out hair</i> , or <i>hit himself or herself</i> while upset or angry?..... | <input type="radio"/> 0 | <input type="radio"/> 3  | <input type="radio"/> 6  | <input type="radio"/> 9  |
| 2. How many times did your child <i>bang his or her head, hit his or her fists into the wall, or throw himself or herself</i> on the floor?.....               | <input type="radio"/> 0 | <input type="radio"/> 6  | <input type="radio"/> 12 | <input type="radio"/> 18 |
| 3. How many times did your child <i>cut, bruise, or burn</i> himself or herself on purpose?.....                                                               | <input type="radio"/> 0 | <input type="radio"/> 9  | <input type="radio"/> 18 | <input type="radio"/> 27 |
| 4. How many times did your child <i>severely injure</i> himself or herself, or <i>tried to kill</i> himself or herself?.....                                   | <input type="radio"/> 0 | <input type="radio"/> 12 | <input type="radio"/> 24 | <input type="radio"/> 36 |
| 5. Other incidents in which your child acted harmfully toward himself or herself (Please describe):                                                            |                         |                          |                          |                          |

**Staff Use:**

VE.....

PH...

PR.....

SE.....

Total.....
